# Supplementary material for: Digital Literacy and Online Resilience as Facilitators of Young People’s Well-Being?
Source: Atypon-hosted journal article supplement (doi:10.1027/1016-9040/a000478), 2022-04-01
Supplement: 1016-9040_a000478_esm1.pdf [file 1016-9040_a000478_esm1.pdf]

**Table E1.** Overview of studies included in the review

| Author(s)                  | Sample size | Age             | Method       | Concept(s) studied            | Finding(s)                                                                                                                                                                                                                                                     |
|----------------------------|-------------|-----------------|--------------|-------------------------------|----------------------------------------------------------------------------------------------------------------------------------------------------------------------------------------------------------------------------------------------------------------|
| Bahramian et al. (2018)    | N = 139     | 13–15 years old | Survey       | Digital literacy<br>Wellbeing | - Weak positive correlation ( $r = .16$ , $p < .05$ ) between digital literacy and wellbeing.                                                                                                                                                                  |
| Cabello-Hutt et al. (2018) | N = 1694    | 11–17 years old | Survey       | Digital literacy              | - Medium positive association ( $\beta = .25$ , $p < .01$ ) between digital literacy and online opportunities.<br>- Weak indirect positive association ( $\beta = .06$ , $p < .01$ ) between digital literacy and online risks (through online opportunities). |
| El Asam & Katz (2018)      | N = 2988    | 10–16 years old | Survey       | Wellbeing                     | - Medium positive associations between offline vulnerabilities and online risk experiences.                                                                                                                                                                    |
| Hinduja & Patchin (2017)   | N = 1204    | 12–17 years old | Survey       | Online resilience             | - Medium negative association ( $\beta = -.46$ , $p < .05$ ) between resilience and cyberbullying victimization.                                                                                                                                               |
| Hudson et al. (2016)       | N = 763     | 14–21 years old | Survey       | Online resilience             | - Weak negative correlations between cyber-victimization and the use of certain privacy settings as coping strategies (limiting visibility of personal information ( $r = -.09$ , $p < .05$ ) and posts and comments ( $r = -.16$ , $p < .01$ )).              |
| Jacobs et al. (2015)       | N = 66      | 12–15 years old | Focus groups | Online resilience             | - Young people mainly cope with cyberbullying in a passive manner.                                                                                                                                                                                             |

|                              |          |                 |        |                   |                                                                                                                                                                                                                                                                                                                                                                    |
|------------------------------|----------|-----------------|--------|-------------------|--------------------------------------------------------------------------------------------------------------------------------------------------------------------------------------------------------------------------------------------------------------------------------------------------------------------------------------------------------------------|
| Keipi et al. (2018)          | N = 1569 | 15–30 years old | Survey | Wellbeing         | <ul style="list-style-type: none"> <li>- Weak negative association (<math>\beta = -.10</math>, <math>p &lt; .05</math>) between exposure to online hate material and wellbeing.</li> <li>- Weak negative association (<math>\beta = -.14</math>, <math>p &lt; .01</math>) between online victimization and wellbeing.</li> </ul>                                   |
| Lee & Chae (2012)            | N = 566  | 10–15 years old | Survey | Digital literacy  | <ul style="list-style-type: none"> <li>- Digital literacy weakly moderates the association between online activities and online risks (<math>\beta = -.11</math>, <math>p &lt; .01</math>): association weakens for children with higher skill levels.</li> </ul>                                                                                                  |
| Livingstone & Helsper (2010) | N = 789  | 12–17 years old | Survey | Digital literacy  | <ul style="list-style-type: none"> <li>- Medium positive association (<math>\beta = .38</math>, <math>p &lt; .05</math>) between digital literacy and online opportunities.</li> <li>- Weak indirect positive association (<math>\beta = .19</math>, <math>p &lt; .05</math>) between digital literacy and online risks (through online opportunities).</li> </ul> |
| Livingstone et al. (2017)    | N = 6400 | 6–14 years old  | Survey | Digital literacy  | <ul style="list-style-type: none"> <li>- Weak positive association (<math>\beta = .19</math>, <math>p &lt; .05</math>) between digital literacy and online opportunities.</li> <li>- Weak positive association (<math>\beta = .09</math>, <math>p &lt; .05</math>) between digital literacy and online risk experiences.</li> </ul>                                |
| Lwin et al. (2012)           | N = 537  | 12–19 years old | Survey | Online resilience | <ul style="list-style-type: none"> <li>- Medium positive association (<math>\beta = .42</math>, <math>p &lt; .001</math>) between coping self-efficacy beliefs and intention to engage in online protection behavior.</li> </ul>                                                                                                                                   |

|                         |                  |                 |                    |                                |                                                                                                                                                                                                                                                                                                                                                                                                                                           |
|-------------------------|------------------|-----------------|--------------------|--------------------------------|-------------------------------------------------------------------------------------------------------------------------------------------------------------------------------------------------------------------------------------------------------------------------------------------------------------------------------------------------------------------------------------------------------------------------------------------|
| McHugh et al. (2017)    | N = 68           | 13–17 years old | Diary method       | Wellbeing<br>Online resilience | <ul style="list-style-type: none"> <li>- Medium positive association (<math>\beta = .46, p &lt; .01</math>) between cyberbullying victimization and negative affect.</li> <li>- Weak positive association (<math>\beta = .16, p &lt; .05</math>) between exposure to explicit content and negative affect.</li> <li>- Young people show online resilience: their mood stabilized rather quickly after online risk experiences.</li> </ul> |
| McHugh et al. (2018)    | N = 75           | 13–17 years old | Diary method       | Online resilience<br>Wellbeing | <ul style="list-style-type: none"> <li>- Medium positive association (<math>\beta = .35, p &lt; .01</math>) between online sexual solicitation and symptoms of PTSD.</li> <li>- Declines in wellbeing, instead of risk exposure itself, cause young people to engage in coping behavior.</li> </ul>                                                                                                                                       |
| Modecki & Barber (2013) | N = 1364         | 12–14 years old | Survey             | Wellbeing                      | <ul style="list-style-type: none"> <li>- Negative association between self-esteem and cyber-perpetration and -victimization.</li> <li>- Positive association between depressed mood and cyber-perpetration and -victimization.</li> </ul>                                                                                                                                                                                                 |
| Nansen et al. (2012)    | N = 5 (families) | 6–10 years old  | Ethnographic study | Wellbeing<br>Online resilience | <ul style="list-style-type: none"> <li>- Children feel harmed when others attack them online, which presents risks to emotional and psychological wellbeing.</li> <li>- Experiencing these risks allows for the development of competences to deal with these risks.</li> </ul>                                                                                                                                                           |

|                                 |          |                 |              |                   |                                                                                                                                                                                                                                                                                                                                     |
|---------------------------------|----------|-----------------|--------------|-------------------|-------------------------------------------------------------------------------------------------------------------------------------------------------------------------------------------------------------------------------------------------------------------------------------------------------------------------------------|
| Notten & Nikken (2016)          | N = 8554 | 14–16 years old | Survey       | Digital literacy  | - Weak positive association ( $\beta = .13$ , $p < .001$ ) between digital literacy and online risk-taking.                                                                                                                                                                                                                         |
| Priebe & Svedin (2012)          | N = 3432 | 16–22 years old | Survey       | Wellbeing         | - Positive association (OR = 2.9, $p < .001$ ) between cyber-victimization and psychiatric symptoms.                                                                                                                                                                                                                                |
| Racatau (2014)                  | N = 24   | 9–16 years old  | Focus groups | Online resilience | - Young people use preventive measures to avoid being harmed by online risks.                                                                                                                                                                                                                                                       |
| Ramos-Soler et al. (2018)       | N = 865  | 10–17 years old | Survey       | Online resilience | - 42% of young people is part of “the prudent group”, who are aware of online risks and take preventive measures to avoid being harmed.                                                                                                                                                                                             |
| Rodriguez-de-Dios et al. (2018) | N = 1446 | 12–18 years old | Survey       | Digital literacy  | - Weak positive association ( $\beta = .15$ , $p < .01$ ) between digital literacy and online risk experiences.                                                                                                                                                                                                                     |
| Rose & Tynes (2015)             | N = 559  | 12–18 years old | Survey       | Wellbeing         | - Bidirectional weak positive relationship between cyber-victimization and depression (cv – dep: $\beta = .15$ , $p < .01$ ; dep – cv: $\beta = .21$ , $p < .01$ )<br>- Reciprocal weak positive relationship between cyber-victimization and anxiety (cv – anx: $\beta = .10$ , $p < .05$ ; anx – cv: $\beta = .15$ , $p < .01$ ). |

|                               |           |                 |        |                   |                                                                                                                                                                                                                 |
|-------------------------------|-----------|-----------------|--------|-------------------|-----------------------------------------------------------------------------------------------------------------------------------------------------------------------------------------------------------------|
| Sevcikova et al. (2014)       | N = 11712 | 11–16 years old | Survey | Digital literacy  | - Positive association (OR = 1.15, $p < .01$ ) between digital literacy and exposure to risky sexual content.                                                                                                   |
| Soldatova & Zotova (2013)     | N = 1025  | 9–16 years old  | Survey | Online resilience | - Most young people prefer active coping strategies to deal with cyberbullying.<br>- Most young people use passive strategies to deal with exposure to sexual content.                                          |
| Sonck & de Haan (2013)        | N = 19406 | 11–16 years old | Survey | Digital literacy  | - Weak positive association ( $\beta = .09$ , $p < .001$ ) between digital literacy and online risk experience.                                                                                                 |
| Staksrud et al. (2013)        | N = 15420 | 9–16 years old  | Survey | Digital literacy  | - Positive associations (all OR's $> 1$ and $p < .05$ ) between digital literacy and online risk experience.<br>- No association between digital literacy and harm from online risks.                           |
| Teimouri et al. (2018)        | N = 420   | 9–16 years old  | Survey | Digital literacy  | - Medium positive association ( $\beta = .46$ , $p < .001$ ) between digital literacy and risky online activities.                                                                                              |
| Van Den Eijnden et al. (2014) | N = 831   | 11–15 years old | Survey | Wellbeing         | - Weak positive association between loneliness and online victimization ( $\beta = .09$ , $p < .05$ ) and weak negative association between online victimization and loneliness ( $\beta = -.13$ , $p < .05$ ). |
| Vandoninck & d'Haenens (2015) | N = 2046  | 10–16 years old | Survey | Online resilience | - The type of risks young people face online determines the coping strategies they will employ.                                                                                                                 |

---

|                          |         |                         |        |                                       |                                                                                                                                                                                                        |
|--------------------------|---------|-------------------------|--------|---------------------------------------|--------------------------------------------------------------------------------------------------------------------------------------------------------------------------------------------------------|
| Vandoninck et al. (2010) | N = 815 | 15–19 years old         | Survey | Online resilience<br>Digital literacy | - Positive association between digital literacy and online risk experience.<br>- Young people mainly use preventive coping strategies.                                                                 |
| Vandoninck et al. (2013) |         | Mean age = 12 years old | Survey | Online resilience<br>Digital literacy | - Association between digital literacy and use of coping strategies for different types of risks.<br>- E.g. negative association (OR = .22) between digital literacy and passive coping after sexting. |

---
