# Supplementary material for: Digital Literacy and Online Resilience as Facilitators of Young People’s Well-Being?
Source: Atypon-hosted journal article supplement (doi:10.1027/1016-9040/a000478), 2022-04-01
Supplement: 1016-9040_a000478_esm2.pdf [file 1016-9040_a000478_esm2.pdf]

**Table E2.** Assessment of weight of evidence

| Author(s)                       | Methodological trustworthiness | Relevance to the review |
|---------------------------------|--------------------------------|-------------------------|
| Bahramian et al. (2018)         | Medium                         | High                    |
| Cabello-Hutt et al. (2018)      | High                           | Medium                  |
| El Asam & Katz (2018)           | High                           | Medium                  |
| Hinduja & Patchin (2017)        | High                           | Medium                  |
| Hudson et al. (2016)            | High                           | Medium                  |
| Jacobs et al. (2015)            | Medium                         | Medium                  |
| Keipi et al. (2018)             | High                           | Medium                  |
| Lee & Chae (2012)               | Medium                         | Medium                  |
| Livingstone & Helsper (2010)    | High                           | Medium                  |
| Livingstone et al. (2017)       | High                           | Medium                  |
| Lwin et al. (2012)              | Medium                         | Medium                  |
| McHugh et al. (2017)            | Medium                         | High                    |
| McHugh et al. (2018)            | Medium                         | High                    |
| Modecki & Barber (2013)         | High                           | Medium                  |
| Nansen et al. (2012)            | Medium                         | High                    |
| Notten & Nikken (2016)          | High                           | Medium                  |
| Priebe & Svedin (2012)          | Medium                         | Medium                  |
| Racatau (2014)                  | Medium                         | Medium                  |
| Ramos-Soler et al. (2018)       | Medium                         | Medium                  |
| Rodriguez-de-Dios et al. (2018) | High                           | Medium                  |
| Rose & Tynes (2015)             | High                           | Medium                  |
| Sevcikova et al. (2014)         | High                           | Medium                  |
| Soldatova & Zotova (2013)       | Medium                         | Medium                  |
| Sonck & de Haan (2013)          | High                           | Medium                  |
| Staksrud et al. (2013)          | High                           | Medium                  |
| Teimouri et al. (2018)          | Medium                         | Medium                  |
| Van Den Eijnden et al. (2014)   | Medium                         | Medium                  |
| Vandoninck & d'Haenens (2015)   | Medium                         | Medium                  |
| Vandoninck et al. (2010)        | Medium                         | High                    |

---

Vandoninck et al. (2013)

Medium

High

---

*Notes.* Criteria for the assessment of methodological trustworthiness: study design, context, sampling, data collection, data analysis, claims and evidence

Criteria for the assessment of relevance: study one central concept in relation to risks (= medium score), study association between two or more concepts (= high score)
