# Supplementary material for: Digital Literacy and Online Resilience as Facilitators of Young People’s Well-Being?
Source: Atypon-hosted journal article supplement (doi:10.1027/1016-9040/a000478), 2022-04-01
Supplement: 1016-9040_a000478_esm3.pdf [file 1016-9040_a000478_esm3.pdf]

**Table E3.** Checklist quality assessment (Weight of Evidence)

| 1. Methodological trustworthiness                                                                                                                                                                                                                                                                                                      |                                                                                                      |
|----------------------------------------------------------------------------------------------------------------------------------------------------------------------------------------------------------------------------------------------------------------------------------------------------------------------------------------|------------------------------------------------------------------------------------------------------|
| Criteria                                                                                                                                                                                                                                                                                                                               | Considerations                                                                                       |
| Design                                                                                                                                                                                                                                                                                                                                 | Is an adequate study design used to answer the research questions? Is the design rigorous?           |
| Context                                                                                                                                                                                                                                                                                                                                | Is the context in which the research was conducted clearly described?                                |
| Sampling                                                                                                                                                                                                                                                                                                                               | Is the sampling strategy clearly described and appropriate?                                          |
| Data collection                                                                                                                                                                                                                                                                                                                        | Is the process of data collection clearly described and appropriate?                                 |
| Data analysis                                                                                                                                                                                                                                                                                                                          | Is the data analysis strategy clearly described and appropriate?                                     |
| Claims and evidence                                                                                                                                                                                                                                                                                                                    | Are the claims and the evidence to support these claims grounded in sufficient and appropriate data? |
| 2. Relevance to the review                                                                                                                                                                                                                                                                                                             |                                                                                                      |
| How relevant is the study to the review? To what extent does the study cover online resilience, digital literacy, or wellbeing in the face of negative online experiences? To what extent does the study cover the associations between online resilience, digital literacy, and wellbeing in the face of negative online experiences? |                                                                                                      |

For each study, the criteria were considered and an overall score of “low”, “medium”, or “high” was assigned.
