# Supplementary material for: Digital Literacy and Online Resilience as Facilitators of Young People’s Well-Being?
Source: Atypon-hosted journal article supplement (doi:10.1027/1016-9040/a000478), 2022-04-01
Supplement: 1016-9040_a000478_esm4.pdf [file 1016-9040_a000478_esm4.pdf]

**Table E4.** Overview of studies subjected to full-text review but excluded from the final review

| Author(s)                    | Title                                                                                                                               | Reason(s) for exclusion                                                                                    |
|------------------------------|-------------------------------------------------------------------------------------------------------------------------------------|------------------------------------------------------------------------------------------------------------|
| Barbovski & Marinescu (2011) | Being in contact with strangers: Teenagers' exploration of alternative identities online                                            | - Focus only on risk experience and not association with wellbeing, online resilience, or digital literacy |
| Cao & Lin (2015)             | How do victims react to cyberbullying on social networking sites? The influence of previous cyberbullying victimization experiences | - Focus on bystander reaction strategies to cyberbullying                                                  |
| Ferrari (2013)               | DIGCOMP: A framework for developing and understanding digital competence in Europe                                                  | - Framework of digital competence; online risks, online resilience or wellbeing not included               |
| Görzig (2016)                | Adolescents' experience of offline and online risks: Separate and joint propensities                                                | - Focus on online risk experiences, not association with online resilience, digital literacy, or wellbeing |
| Hatlevik et al. (2015)       | Predictors of digital competence in 7th grade: A multilevel analysis                                                                | - Association of digital competence with risk experiences, online resilience, or wellbeing was not tested  |
| Hatlevik et al. (2018)       | Students' ICT self-efficacy and computer and information literacy: Determinants and relationships                                   | - Association of digital competence with risk experiences, online resilience, or wellbeing was not tested  |
| Jacobs et al. (2014)         | Determinants of adolescents' ineffective and improved coping with cyberbullying: A Delphi study                                     | - Delphi study with experts                                                                                |
| James et al. (2017)          | New challenges in adolescent safeguarding                                                                                           | - Review article instead of empirical study                                                                |

|                            |                                                                                                                                                                 |                                                                                                                      |
|----------------------------|-----------------------------------------------------------------------------------------------------------------------------------------------------------------|----------------------------------------------------------------------------------------------------------------------|
| Jonsson et al. (2015)      | Online sexual behaviours among Swedish youth: Associations to background factors, behaviours and abuse                                                          | - Minimum age is 16, does not include larger range of secondary school age (12 to 18)                                |
| Lough et al. (2015)        | Mapping real-world to online vulnerability in young people with developmental disorders: Illustrations from autism and Williams syndrome                        | - Review article instead of empirical study                                                                          |
| Machackova et al. (2013)   | Effectiveness of coping strategies for victims of cyberbullying                                                                                                 | - Focus on effectiveness of coping strategies, not on association with digital literacy or wellbeing                 |
| Navarro et al. (2018)      | Differences between preadolescent victims and non-victims of cyberbullying in cyber-relationship motives and coping strategies for handling problems with peers | - Age of sample is too young (10 to 12 years old)                                                                    |
| Pereira & Matos (2016)     | Cyber-stalking victimization: What predicts fear among Portuguese adolescents?                                                                                  | - Focus on experience with cyber-stalking, not on association with online resilience, digital literacy, or wellbeing |
| Pereira et al. (2016)      | Cyber-harassment victimization in Portugal: Prevalence, fear and help-seeking among adolescents                                                                 | - Focus on risk experience, not on association with online resilience, digital literacy, or wellbeing                |
| Resnik & Bellmore (2019)   | Connecting online and offline social skills to adolescents' peer victimization and psychological adjustment                                                     | - Measure of peer victimization also includes offline victimization                                                  |
| Savimäki & Kaakinen (2018) | Disquieted by online hate: Negative experiences of Finnish adolescents and young adults                                                                         | - Focus on risk experience, not on association with online resilience, digital literacy, or wellbeing                |
| Singh (2018)               | Mapping online child safety in Asia and the Pacific                                                                                                             | - Review article instead of empirical study                                                                          |

|                               |                                                                                                                                                                 |                                                                                                                                                               |
|-------------------------------|-----------------------------------------------------------------------------------------------------------------------------------------------------------------|---------------------------------------------------------------------------------------------------------------------------------------------------------------|
| Soldatova & Rasskazova (2016) | Adolescent safety on the internet                                                                                                                               | - Sample includes children younger than 12 years old<br>- Focus on risk experience, not on association with online resilience, digital literacy, or wellbeing |
| Sumter & Baumgartner (2017)   | Psychosomatic complaints in adolescence: Untangling the relationship between offline and online peer victimization, psychosomatic complaints and social support | - Focus on psychosomatic complaints rather than psychological wellbeing                                                                                       |
| Van Ingen & Matzat (2019)     | Inequality in mobilizing online help after a negative life event: the role of education, digital skills, and capital-enhancing Internet use                     | - Minimum age is 16, does not include larger range of secondary school age (12 to 18)                                                                         |
| Van Ingen et al. (2016)       | Online coping after negative life events: Measurement, prevalence, and relation with internet activities and wellbeing                                          | - Minimum age is 16, does not include larger range of secondary school age (12 to 18)                                                                         |
| Youn (2009)                   | Determinants of online privacy concern and its influence on privacy protection behaviors among young adolescents                                                | - Focus on concern about risk and not actual risk experience                                                                                                  |
| Zilka (2018)                  | eSafety and sharing habits with family and friends among children and adolescents                                                                               | - Focus on digital literacy, not on association with online risk experience, online resilience, or wellbeing                                                  |
